# Supplementary material for: Favorable pleiotropic effects of sodium glucose cotransporter 2 inhibitors: head-to-head comparisons with dipeptidyl peptidase-4 inhibitors in type 2 diabetes patients
Source: PubMed Central journal article supplement (PMC7014757; doi:10.1186/s12933-020-0990-2), 2020-02-12
Supplement: 12933_2020_990_MOESM1_ESM.pdf [file 12933_2020_990_MOESM1_ESM.pdf]

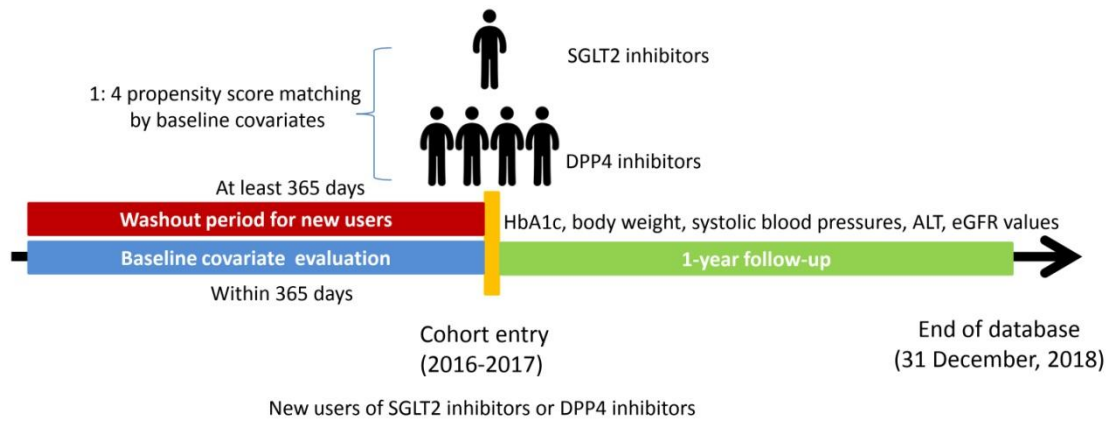

**Figure S1.** Overview of Study design

| <b>Table S1. ICD codes for co-morbidity</b> |                         |                                                 |
|---------------------------------------------|-------------------------|-------------------------------------------------|
| Diseases                                    | ICD-9 codes             | ICD-10 codes                                    |
| Hypertension                                | 401, 402, 403, 404, 405 | I10, I11, I12, I13, I15, I16                    |
| Hyperlipidemia                              | 272                     | E78                                             |
| Coronary heart disease                      | 410, 411, 412, 413, 414 | I20, I21, I22, I23, I24, I25                    |
| Peripheral artery disease                   | 440                     | I70, I73                                        |
| Heart failure                               | 428                     | I50                                             |
| Ischemic stroke                             | 433,434                 | I63                                             |
| Diabetic retinopathy                        | 2505                    | E083, E113                                      |
| Diabetic neuropathy                         | 2506                    | E084, E114                                      |
| Diabetic nephropathy                        | 2504                    | E082, E112                                      |
| Liver cirrhosis                             | 5712, 5715              | K702, K7030, K7031, K741, K742,<br>K7460, K7469 |
| Cancer                                      | 140-239                 | C0-D4                                           |

| <b>Table S2. List for co-medication</b>                                      |                                                                                                                                     |
|------------------------------------------------------------------------------|-------------------------------------------------------------------------------------------------------------------------------------|
| Drug class                                                                   | Drug name                                                                                                                           |
| Anti-platelet agents                                                         | Aspirin, clopidogrel, dipyridamole, ticagrelor                                                                                      |
| Beta blocker                                                                 | Atenolol, bisoprolol, carvedilol, metoprolol,<br>propranolol,                                                                       |
| Angiotensin-converting enzyme inhibitors<br>or angiotensin receptor blockers | Azilsartan, candesartan, captopril, enalapril,<br>fosinopril, irbesartan, losartan, olmesartan, ramipril<br>telmisartan, valsartan  |
| Calcium channel blockers                                                     | Amlodipine, diltiazem, felodipine, lercanidipine,<br>nifedipine, verapamil                                                          |
| Diuretics                                                                    | Acetazolamide, Amiloride, Benzyl hydrochlorothiazide,<br>Bumetanide, Furosemide, Hydrochlorothiazide,<br>Indapamide, Spironolactone |
| Statin                                                                       | Atorvastatin, fluvastatin, pitavastatin, rosuvastatin,<br>simvastatin                                                               |
| Fibrate                                                                      | Fenofibrate, gemfibrozil                                                                                                            |
| Sulfonylurea                                                                 | Glipizide, gliclazide, glimepiride, glyburide                                                                                       |
| Thiazolidinediones                                                           | Pioglitzone                                                                                                                         |
| Glinides                                                                     | Nateglinide, meglitinide, repaglinde                                                                                                |
| Glucagon-like peptide-1 receptor<br>antagonists                              | Dulaglutide, exenatide, liraglutide                                                                                                 |
| Insulin                                                                      | Rapid, short, intermediate and long-acting insulins                                                                                 |

**Table S3.** As-treated analyses of the changes in clinical parameters from the baseline to 1 year post treatment

|                                      | SGLT2 inhibitors | DPP4 inhibitors | P value |
|--------------------------------------|------------------|-----------------|---------|
| HbA1c, % (SD)                        |                  |                 |         |
| Pre-treatment                        | 8.8±1.7          | 8.4±1.8         | <0.001  |
| Post-treatment                       | 7.6±1.1          | 7.3±1.2         | <0.001  |
| Changes from baseline                | -1.2±1.5         | -1.1±1.8        | 0.390   |
| Body weight, kg (SD)                 |                  |                 |         |
| Pre-treatment                        | 72.0±13.0        | 70.5±13.5       | 0.004   |
| Post-treatment                       | 70.4±12.6        | 69.8±12.6       | 0.214   |
| Changes from baseline                | -1.7±6.8         | -0.8±7.7        | 0.001   |
| SBP, mmHg (SD)                       |                  |                 |         |
| Pre-treatment                        | 139.4±19.6       | 138.9±20.3      | 0.537   |
| Post-treatment                       | 135.4±19.2       | 138.6±20.4      | <0.001  |
| Changes from baseline                | -4.0±19.7        | -0.3±21.7       | <0.001  |
| ALT, U/L (SD)                        |                  |                 |         |
| Pre-treatment                        | 33.9±27.2        | 32.3±34.7       | 0.148   |
| Post-treatment                       | 29.8±23.8        | 31.1±26.9       | 0.170   |
| Changes from baseline                | -4.2±27.5        | -1.2±35.7       | 0.011   |
| eGFR, ml/min/1.73m <sup>2</sup> (SD) |                  |                 |         |
| Pre-treatment                        | 93.7±28.2        | 87.7±36.8       | <0.001  |
| Post-treatment                       | 91.0±27.7        | 83.7±32.8       | <0.001  |
| Changes from baseline                | -2.7±17.8        | -4.0±20.9       | 0.085   |

**Table S4.** Subgroup analyses of the changes in clinical parameters from the baseline to 1 year post treatment

|                                              | SGLT2 inhibitors | DPP4 inhibitors | P value |
|----------------------------------------------|------------------|-----------------|---------|
| Patients with HbA1c >7%                      | N=1,698          | N=6,700         |         |
| HbA1c, % (SD)                                |                  |                 |         |
| Pre-treatment                                | 9.1±1.7          | 9.0±1.8         | 0.182   |
| Post-treatment                               | 7.8±1.3          | 7.6±1.3         | <0.001  |
| Changes from baseline                        | -1.3±1.7         | -1.4±1.9        | 0.018   |
| Body weight, kg (SD)                         |                  |                 |         |
| Pre-treatment                                | 71.2±13.5        | 71.1±14.1       | 0.771   |
| Post-treatment                               | 69.8±12.8        | 70.2±12.9       | 0.300   |
| Changes from baseline                        | -1.4±7.8         | -0.9±8.1        | 0.027   |
| SBP, mmHg (SD)                               |                  |                 |         |
| Pre-treatment                                | 139.2±20.2       | 138.9±20.6      | 0.644   |
| Post-treatment                               | 136.2±19.6       | 138.2±20.2      | <0.001  |
| Changes from baseline                        | -3.1±20.4        | -0.7±22.2       | <0.001  |
| ALT, U/L (SD)                                |                  |                 |         |
| Pre-treatment                                | 34.7±33.6        | 33.7±31.0       | 0.254   |
| Post-treatment                               | 30.0±23.4        | 33.3±44.8       | <0.001  |
| Changes from baseline                        | -4.6±34.0        | -0.4±47.6       | <0.001  |
| eGFR, ml/min/1.73m <sup>2</sup> (SD)         |                  |                 |         |
| Pre-treatment                                | 92.5±29.0        | 92.0±38.9       | 0.536   |
| Post-treatment                               | 90.1±29.3        | 87.1±33.5       | <0.001  |
| Changes from baseline                        | -2.4±17.7        | -4.9±25.8       | <0.001  |
| Patients with HbA1c ≤7%                      | N=320            | N=1,412         |         |
| HbA1c, % (SD)                                |                  |                 |         |
| Pre-treatment                                | 6.5±0.4          | 6.5±0.5         | 0.348   |
| Post-treatment                               | 6.8±0.8          | 6.7±1.0         | 0.633   |
| Changes from baseline                        | 0.2±0.78         | 0.2±1.0         | 0.994   |
| Body weight, kg (SD)                         |                  |                 |         |
| Pre-treatment                                | 73.5±14.3        | 70.3±14.2       | <0.001  |
| Post-treatment                               | 71.6±13.3        | 69.2±13.1       | 0.004   |
| Changes from baseline                        | -1.9±6.8         | -1.1±8.1        | 0.073   |
| SBP, mmHg (SD)                               |                  |                 |         |
| Pre-treatment                                | 134.6±17.8       | 136.8±19.9      | 0.055   |
| Post-treatment                               | 134.9±18.0       | 136.5±20.6      | 0.182   |
| Changes from baseline                        | 0.2±20.2         | -0.3±21.9       | 0.690   |
| ALT, U/L (SD)                                |                  |                 |         |
| Pre-treatment                                | 32.6±24.2        | 29.4±31.6       | 0.047   |
| Post-treatment                               | 31.8±27.7        | 31.0±76.6       | 0.769   |
| Changes from baseline                        | -0.8±25.4        | 1.6±79.2        | 0.336   |
| eGFR, ml/min/1.73m <sup>2</sup> (SD)         |                  |                 |         |
| Pre-treatment                                | 90.1±31.5        | 79.9±38.0       | <0.001  |
| Post-treatment                               | 87.7±29.5        | 78.5±34.4       | <0.001  |
| Changes from baseline                        | -2.4±22.3        | -1.4±24.6       | 0.453   |
| Patients with >1 anti-diabetes medication at | N=1,116          | N=4,208         |         |

|                                                       |            |            |        |
|-------------------------------------------------------|------------|------------|--------|
| baseline                                              |            |            |        |
| HbA1c, % (SD)                                         |            |            |        |
| Pre-treatment                                         | 9.1±1.8    | 9.0±2.1    | 0.091  |
| Post-treatment                                        | 7.9±1.4    | 7.7±1.4    | <0.001 |
| Changes from baseline                                 | -1.2±1.8   | -1.3±2.1   | 0.469  |
| Body weight, kg (SD)                                  |            |            |        |
| Pre-treatment                                         | 70.0±13.0  | 69.5±13.6  | 0.238  |
| Post-treatment                                        | 68.7±12.4  | 68.9±12.6  | 0.508  |
| Changes from baseline                                 | -1.4±6.5   | -0.5±7.7   | <0.001 |
| SBP, mmHg (SD)                                        |            |            |        |
| Pre-treatment                                         | 138.8±20.2 | 138.4±20.7 | 0.475  |
| Post-treatment                                        | 136.3±19.5 | 138.1±20.7 | 0.008  |
| Changes from baseline                                 | -2.6±20.4  | -0.2±22.4  | 0.001  |
| ALT, U/L (SD)                                         |            |            |        |
| Pre-treatment                                         | 33.9±35.9  | 30.9±28.0  | 0.010  |
| Post-treatment                                        | 29.2±23.1  | 32.3±62.1  | 0.008  |
| Changes from baseline                                 | -4.6±35.5  | 1.5±63.8   | <0.001 |
| eGFR, ml/min/1.73m <sup>2</sup> (SD)                  |            |            |        |
| Pre-treatment                                         | 91.4±29.4  | 90.6±40.7  | 0.442  |
| Post-treatment                                        | 88.5±29.5  | 85.4±33.9  | 0.002  |
| Changes from baseline                                 | -2.8±18.2  | -5.2±28.1  | <0.001 |
| Patients with ≤1 anti-diabetes medication at baseline | N=912      | N=3,904    |        |
| HbA1c, % (SD)                                         |            |            |        |
| Pre-treatment                                         | 8.1±1.7    | 8.1±1.6    | 0.952  |
| Post-treatment                                        | 7.3±1.1    | 7.2±1.1    | 0.002  |
| Changes from baseline                                 | -0.8±1.4   | -0.9±1.6   | 0.012  |
| Body weight, kg (SD)                                  |            |            |        |
| Pre-treatment                                         | 73.5±14.2  | 72.5±14.5  | 0.071  |
| Post-treatment                                        | 71.8±13.3  | 71.1±13.3  | 0.164  |
| Changes from baseline                                 | -1.6±8.8   | -1.4±8.4   | 0.556  |
| SBP, mmHg (SD)                                        |            |            |        |
| Pre-treatment                                         | 138.0±19.4 | 138.8±20.2 | 0.270  |
| Post-treatment                                        | 135.5±19.2 | 137.7±19.8 | 0.003  |
| Changes from baseline                                 | -2.5±20.3  | -1.1±21.9  | 0.072  |
| ALT, U/L (SD)                                         |            |            |        |
| Pre-treatment                                         | 34.9±27.1  | 35.1±34.1  | 0.839  |
| Post-treatment                                        | 31.6±25.4  | 33.6±37.5  | 0.063  |
| Changes from baseline                                 | -3.3±29.2  | -1.6±42.1  | 0.165  |
| eGFR, ml/min/1.73m <sup>2</sup> (SD)                  |            |            |        |
| Pre-treatment                                         | 93.1±29.5  | 89.2±37.1  | <0.001 |
| Post-treatment                                        | 91.0±29.2  | 85.9±33.6  | <0.001 |
| Changes from baseline                                 | -1.9±18.9  | -3.3±22.7  | 0.059  |
| Patients with ALT ≤ 1X ULN                            | N=1591     | N=6529     |        |
| HbA1c, % (SD)                                         |            |            |        |

|                                         |            |            |        |
|-----------------------------------------|------------|------------|--------|
| Pre-treatment                           | 8.7±1.9    | 8.5±2.0    | <0.001 |
| Post-treatment                          | 7.7±1.3    | 7.5±1.3    | <0.001 |
| Changes from baseline                   | -1.0±1.7   | -1.1±1.9   | 0.164  |
| Body weight, kg (SD)                    |            |            |        |
| Pre-treatment                           | 70.6±13.2  | 70.1±13.6  | 0.235  |
| Post-treatment                          | 69.3±12.6  | 69.4±12.5  | 0.767  |
| Changes from baseline                   | -1.3±7.9   | -0.8±7.9   | 0.024  |
| SBP, mmHg (SD)                          |            |            |        |
| Pre-treatment                           | 138.7±20.0 | 138.3±20.5 | 0.480  |
| Post-treatment                          | 136.2±19.5 | 137.9±20.7 | 0.002  |
| Changes from baseline                   | -2.6±20.5  | -0.4±22.3  | <0.001 |
| ALT, U/L (SD)                           |            |            |        |
| Pre-treatment                           | 23.6±9.2   | 23.1±9.3   | 0.073  |
| Post-treatment                          | 26.1±19.8  | 27.8±49.0  | 0.026  |
| Changes from baseline                   | 2.5±19.9   | 4.7±48.8   | 0.005  |
| eGFR, ml/min/1.73m <sup>2</sup> (SD)    |            |            |        |
| Pre-treatment                           | 90.6±29.5  | 87.5±38.4  | <0.001 |
| Post-treatment                          | 88.1±29.5  | 83.6±34.2  | <0.001 |
| Changes from baseline                   | -2.5±18.4  | -3.9±24.1  | 0.007  |
| Patients with ALT >1X ULN               | N=437      | N=1,583    |        |
| HbA1c, % (SD)                           |            |            |        |
| Pre-treatment                           | 8.5±1.7    | 8.7±1.8    | 0.108  |
| Post-treatment                          | 7.4±1.2    | 7.4±1.3    | 0.750  |
| Changes from baseline                   | -1.1±1.6   | -1.2±1.9   | 0.185  |
| Body weight, kg (SD)                    |            |            |        |
| Pre-treatment                           | 75.1±14.6  | 74.2±15.8  | 0.258  |
| Post-treatment                          | 73.1±13.6  | 72.6±14.3  | 0.538  |
| Changes from baseline                   | -2.2±6.4   | -1.6±8.7   | 0.132  |
| SBP, mmHg (SD)                          |            |            |        |
| Pre-treatment                           | 137.5±19.4 | 139.6±20.1 | 0.052  |
| Post-treatment                          | 135.3±18.8 | 137.9±18.6 | 0.013  |
| Changes from baseline                   | -2.1±19.8  | -1.7±21.7  | 0.735  |
| ALT, U/L (SD)                           |            |            |        |
| Pre-treatment                           | 73.5±50.6  | 73.4±50.8  | 0.963  |
| Post-treatment                          | 45.6±31.6  | 53.8±57.1  | <0.001 |
| Changes from baseline                   | -27.9±53.4 | -19.6±69.8 | 0.008  |
| eGFR, ml/min/1.73m <sup>2</sup> (SD)    |            |            |        |
| Pre-treatment                           | 98.0±28.6  | 99.7±40.0  | 0.315  |
| Post-treatment                          | 95.5±28.2  | 93.8±30.6  | 0.263  |
| Changes from baseline                   | -2.3±19.1  | -5.7±31.1  | 0.004  |
| Patients with BMI ≥27 kg/m <sup>2</sup> | N=987      | N=3,515    |        |
| HbA1c, % (SD)                           |            |            |        |
| Pre-treatment                           | 8.5±1.7    | 8.5±1.8    | 0.428  |

|                                         |            |            |        |
|-----------------------------------------|------------|------------|--------|
| Post-treatment                          | 7.4±1.3    | 7.5±1.3    | 0.235  |
| Changes from baseline                   | -1.0±1.6   | -1.1±1.8   | 0.086  |
| Body weight, kg (SD)                    |            |            |        |
| Pre-treatment                           | 80.4±11.7  | 80.9±12.7  | 0.190  |
| Post-treatment                          | 77.1±12.3  | 77.5±12.8  | 0.359  |
| Changes from baseline                   | -3.2±7.8   | -3.4±9.0   | 0.495  |
| SBP, mmHg (SD)                          |            |            |        |
| Pre-treatment                           | 140.9±18.4 | 141.7±19.9 | 0.237  |
| Post-treatment                          | 137.5±19.6 | 140.4±19.8 | <0.001 |
| Changes from baseline                   | -3.4±20.5  | -1.3±22.3  | <0.001 |
| ALT, U/L (SD)                           |            |            |        |
| Pre-treatment                           | 38.9±36.5  | 37.1±28.9  | 0.145  |
| Post-treatment                          | 32.6±24.6  | 36.7±60.1  | 0.002  |
| Changes from baseline                   | -6.3±36.6  | -0.4±59.4  | <0.001 |
| eGFR, ml/min/1.73m <sup>2</sup> (SD)    |            |            |        |
| Pre-treatment                           | 92.8±28.2  | 88.0±37.6  | <0.001 |
| Post-treatment                          | 90.6±27.9  | 84.3±32.1  | <0.001 |
| Changes from baseline                   | -2.2±17.7  | -3.5±25.5  | 0.066  |
| Patients with BMI <27 kg/m <sup>2</sup> | N=964      | N=4,102    |        |
| HbA1c, % (SD)                           |            |            |        |
| Pre-treatment                           | 8.8±1.8    | 8.6±2.0    | 0.001  |
| Post-treatment                          | 7.8±1.3    | 7.5±1.3    | <0.001 |
| Changes from baseline                   | -1.1±1.7   | -1.1±1.9   | 0.266  |
| Body weight, kg (SD)                    |            |            |        |
| Pre-treatment                           | 62.8±9.0   | 62.6±9.1   | 0.499  |
| Post-treatment                          | 63.0±9.4   | 63.7±9.5   | 0.024  |
| Changes from baseline                   | 0.1±6.7    | 1.1±6.2    | <0.001 |
| SBP, mmHg (SD)                          |            |            |        |
| Pre-treatment                           | 136.1±20.4 | 136.0±20.5 | 0.935  |
| Post-treatment                          | 134.4±18.8 | 135.8±21.9 | 0.036  |
| Changes from baseline                   | -1.7±20.1  | -0.2±21.9  | 0.034  |
| ALT, U/L (SD)                           |            |            |        |
| Pre-treatment                           | 29.9±27.2  | 29.8±33.6  | 0.942  |
| Post-treatment                          | 28.0±23.6  | 29.9±45.4  | 0.062  |
| Changes from baseline                   | -1.9±29.1  | 0.1±52.2   | 0.105  |
| eGFR, ml/min/1.73m <sup>2</sup> (SD)    |            |            |        |
| Pre-treatment                           | 91.8±30.6  | 91.1±38.8  | 0.569  |
| Post-treatment                          | 88.7±30.7  | 86.5±34.5  | 0.047  |
| Changes from baseline                   | -3.0±19.0  | -4.7±23.6  | 0.016  |
